# Supplementary material
Source: PubMed Central journal article supplement (PMC3617858)
Supplement: SD2.pdf [file SD2.pdf]

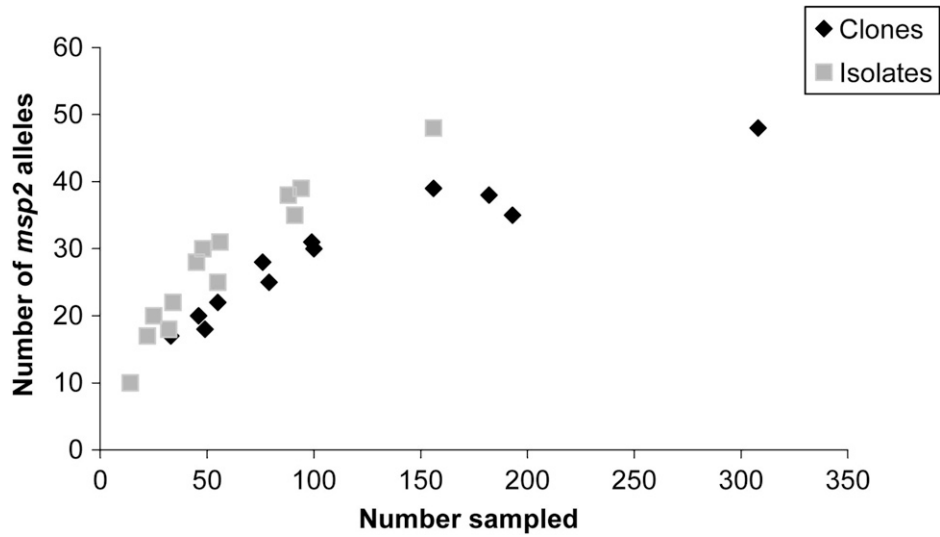

FIGURE S1. Relationship between sample size and the genetic diversity of *Plasmodium falciparum* populations in Papua New Guinea. The number of alleles ( $A$ ) identified in each population was compared with the number of isolates and the total number of clones, which was calculated by summing the number of clones per isolate.

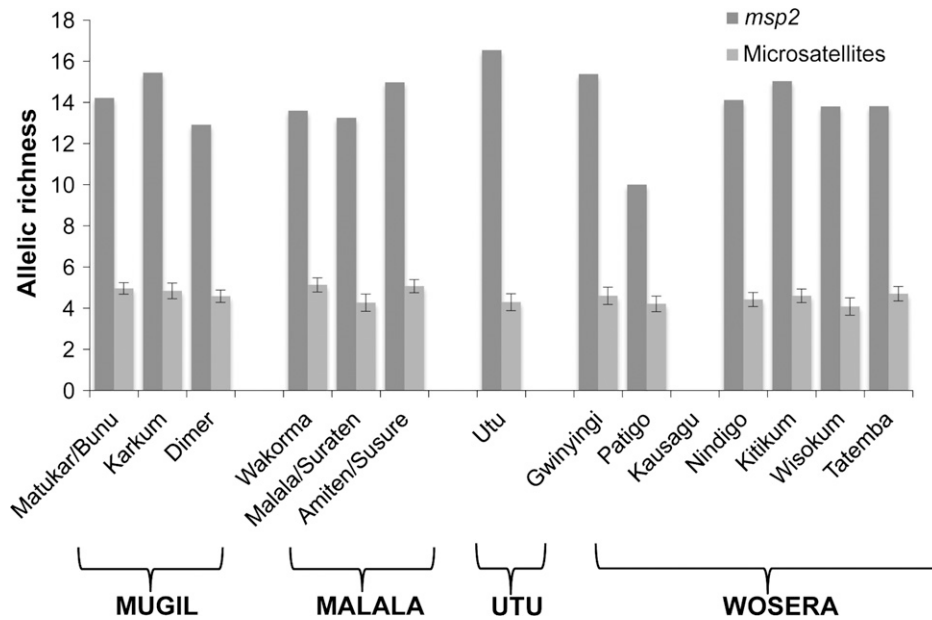

FIGURE S2. Comparison between *Pfmsp2* genotype and microsatellite haplotype diversity of *Plasmodium falciparum* populations of Papua New Guinea. The allelic richness ( $R_s$ ) calculated for each population on the basis of *Pfmsp2* genotypes or microsatellite haplotypes (i.e., the mean for 10 loci), is shown for each village. Error bars indicate the standard error (microsatellites).

SUPPLEMENTAL TABLE 1  
Allele frequencies for *Pfmsp2* in 14 *Plasmodium falciparum* populations of Papua New Guinea

|        |        |           | MADANG       |        |       |         |                |               |       | EAST SEPIK |        |            |         |         |         | ALL      |            |
|--------|--------|-----------|--------------|--------|-------|---------|----------------|---------------|-------|------------|--------|------------|---------|---------|---------|----------|------------|
|        |        |           | Mugil        |        |       | Malala  |                | Uturu         | North | South      |        | North-West |         |         |         |          |            |
|        |        |           | Matukar-Bunu | Karkum | Dimer | Wakorma | Malala-Suraten | Amiten-Susure | Uturu | Gwinyingi  | Patigo | Nindigo    | Kitikum | Wisogum | Tatamba | Weighted | Unweighted |
| Allele | Family | Size (bp) | Frequency    |        |       |         |                |               |       |            |        |            |         |         |         |          |            |
| 1      | 3D7    | 171       | 0.010        | 0.022  |       |         |                | 0.010         | 0.019 |            |        |            |         |         |         | 0.009    | 0.005      |
| 2      | 3D7    | 174       |              |        |       |         |                |               |       | 0.013      |        |            |         |         | 0.002   | 0.002    |            |
| 3      | 3D7    | 183       | 0.029        | 0.011  | 0.082 |         |                | 0.020         | 0.016 | 0.013      |        | 0.013      |         |         | 0.017   | 0.018    |            |
| 4      | 3D7    | 189       | 0.010        | 0.005  | 0.020 | 0.013   |                |               |       |            |        | 0.010      | 0.036   | 0.022   | 0.005   | 0.005    |            |
| 5      | 3D7    | 195       | 0.010        | 0.005  |       |         |                | 0.040         | 0.026 | 0.039      |        | 0.007      |         | 0.018   | 0.016   | 0.014    |            |
| 6      | 3D7    | 201       |              | 0.005  |       |         |                | 0.010         |       |            |        | 0.010      |         |         | 0.002   | 0.002    |            |
| 7      | 3D7    | 204       |              |        |       |         |                | 0.010         |       |            |        | 0.010      |         | 0.043   | 0.003   | 0.005    |            |
| 8      | 3D7    | 207       | 0.005        |        |       |         |                |               |       |            |        |            |         |         | 0.001   |          |            |
| 9      | 3D7    | 210       |              | 0.016  |       |         |                |               |       |            |        |            |         |         | 0.007   | 0.009    |            |
| 10     | 3D7    | 213       | 0.019        |        | 0.020 | 0.025   | 0.032          | 0.040         |       | 0.013      | 0.143  | 0.007      |         | 0.018   | 0.009   | 0.020    |            |
| 11     | 3D7    | 216       |              |        |       |         |                | 0.010         |       |            |        |            |         |         | 0.001   | 0.001    |            |
| 12     | 3D7    | 219       | 0.038        | 0.033  | 0.041 |         |                | 0.051         | 0.049 |            |        |            | 0.010   |         | 0.026   | 0.017    |            |
| 13     | 3D7    | 231       |              |        |       |         |                |               |       | 0.013      |        |            | 0.010   |         | 0.001   | 0.002    |            |
| 14     | 3D7    | 237       |              |        |       |         |                |               | 0.003 | 0.013      |        | 0.026      |         |         | 0.004   | 0.003    |            |
| 15     | 3D7    | 240       | 0.029        | 0.033  |       | 0.013   |                | 0.006         |       |            |        |            |         |         | 0.011   | 0.006    |            |
| 16     | 3D7    | 243       | 0.029        | 0.016  | 0.020 | 0.051   | 0.032          | 0.030         | 0.029 | 0.079      |        | 0.046      | 0.070   |         | 0.033   | 0.031    |            |
| 17     | 3D7    | 246       |              |        |       |         |                |               |       |            |        | 0.007      |         |         | 0.001   | 0.001    |            |
| 18     | 3D7    | 249       | 0.010        | 0.011  |       |         |                | 0.010         | 0.013 |            |        | 0.013      | 0.030   |         | 0.010   | 0.007    |            |
| 19     | 3D7    | 252       |              |        |       |         |                |               | 0.003 |            |        |            |         |         | 0.001   |          |            |
| 20     | 3D7    | 258       |              |        |       |         |                |               |       | 0.013      |        | 0.007      | 0.010   |         | 0.002   | 0.002    |            |
| 21     | 3D7    | 261       | 0.173        | 0.120  | 0.020 | 0.266   | 0.161          | 0.101         | 0.071 | 0.013      | 0.071  |            |         |         | 0.085   | 0.077    |            |
| 22     | 3D7    | 264       |              |        |       |         | 0.032          | 0.010         | 0.039 | 0.026      |        |            |         | 0.018   | 0.001   | 0.004    |            |
| 23     | 3D7    | 267       | 0.038        | 0.066  |       | 0.013   | 0.032          | 0.010         | 0.039 | 0.026      |        | 0.013      | 0.070   | 0.089   | 0.038   | 0.034    |            |
| 24     | 3D7    | 270       |              |        |       |         |                | 0.040         | 0.013 |            |        |            |         |         | 0.006   | 0.004    |            |
| 25     | 3D7    | 273       |              | 0.005  |       |         |                |               |       |            |        |            |         |         | 0.001   | 0.002    |            |
| 26     | 3D7    | 279       |              |        |       |         |                |               | 0.003 |            |        |            |         |         | 0.001   |          |            |
| 27     | 3D7    | 285       |              |        | 0.020 |         |                | 0.010         |       |            |        |            |         |         | 0.001   | 0.002    |            |
| 28     | 3D7    | 288       |              | 0.011  |       |         |                |               |       |            |        |            |         |         | 0.001   | 0.001    |            |
| 29     | 3D7    | 291       |              |        |       |         |                |               | 0.003 |            |        | 0.007      |         |         | 0.001   | 0.001    |            |
| 30     | 3D7    | 294       | 0.005        | 0.022  |       | 0.063   |                | 0.010         | 0.013 |            |        |            | 0.010   |         | 0.012   | 0.011    |            |
| 31     | 3D7    | 297       |              |        |       |         |                |               | 0.010 | 0.013      | 0.071  | 0.118      | 0.030   | 0.018   | 0.019   | 0.020    |            |
| 32     | 3D7    | 300       |              |        |       | 0.013   | 0.032          |               |       |            |        | 0.007      |         |         | 0.002   | 0.004    |            |
| 33     | 3D7    | 303       |              |        |       |         |                | 0.010         |       |            |        |            |         |         | 0.001   | 0.001    |            |
| 34     | 3D7    | 306       | 0.010        | 0.005  |       | 0.013   |                | 0.010         |       |            |        |            |         |         | 0.004   | 0.003    |            |
| 35     | 3D7    | 309       |              |        |       |         |                |               |       |            |        | 0.007      |         |         | 0.001   | 0.001    |            |
| 36     | 3D7    | 312       | 0.019        | 0.011  |       | 0.025   | 0.065          |               | 0.049 |            | 0.071  | 0.039      | 0.030   | 0.036   | 0.022   | 0.024    |            |
| 37     | 3D7    | 315       |              |        |       |         |                |               |       | 0.118      | 0.143  | 0.039      | 0.020   | 0.071   | 0.018   | 0.033    |            |
| 38     | 3D7    | 318       | 0.005        | 0.005  | 0.122 | 0.025   |                | 0.010         | 0.010 |            |        |            | 0.020   | 0.071   | 0.010   | 0.014    |            |
| 39     | 3D7    | 321       |              |        |       |         | 0.065          |               |       |            |        |            |         |         | 0.001   | 0.005    |            |
| 40     | 3D7    | 324       | 0.005        | 0.011  | 0.041 |         | 0.032          | 0.010         | 0.045 | 0.026      |        | 0.026      | 0.010   | 0.018   | 0.022   | 0.019    |            |
| 41     | 3D7    | 327       |              | 0.011  |       |         |                |               |       |            |        |            | 0.010   |         | 0.002   | 0.002    |            |
| 42     | 3D7    | 330       |              | 0.005  |       |         |                |               | 0.010 |            |        | 0.013      | 0.020   | 0.018   | 0.022   | 0.007    |            |
| 43     | 3D7    | 333       | 0.019        | 0.016  |       | 0.013   | 0.032          | 0.040         | 0.032 | 0.118      | 0.071  | 0.033      | 0.040   | 0.036   | 0.032   | 0.036    |            |
| 44     | 3D7    | 336       | 0.048        | 0.077  | 0.041 | 0.051   | 0.097          | 0.091         | 0.094 | 0.039      | 0.071  | 0.052      | 0.100   | 0.036   | 0.073   | 0.073    |            |
| 45     | 3D7    | 342       | 0.063        | 0.060  | 0.163 |         | 0.032          | 0.010         | 0.071 | 0.013      |        | 0.033      | 0.020   | 0.107   | 0.052   | 0.049    |            |
| 46     | 3D7    | 345       |              |        |       |         |                |               | 0.003 |            |        |            |         |         | 0.001   |          |            |
| 47     | 3D7    | 348       |              |        |       |         |                |               | 0.006 |            |        |            |         |         | 0.001   |          |            |
| 48     | 3D7    | 351       |              |        |       |         |                |               |       |            |        |            |         | 0.013   | 0.018   | 0.002    |            |
| 49     | 3D7    | 354       |              |        |       |         |                |               |       |            |        | 0.013      |         |         | 0.001   | 0.001    |            |
| 50     | 3D7    | 357       | 0.048        | 0.027  |       | 0.063   |                | 0.071         | 0.003 | 0.026      |        |            |         | 0.018   | 0.022   | 0.020    |            |
| 51     | 3D7    | 360       | 0.010        | 0.005  | 0.020 |         | 0.032          | 0.030         | 0.016 |            |        | 0.033      | 0.010   |         | 0.015   | 0.015    |            |
| 52     | 3D7    | 366       | 0.010        |        | 0.061 | 0.013   |                |               | 0.010 | 0.013      |        |            |         | 0.018   | 0.008   | 0.010    |            |
| 53     | 3D7    | 372       | 0.014        | 0.033  |       | 0.025   |                |               |       |            |        | 0.007      |         |         | 0.009   | 0.008    |            |
| 54     | 3D7    | 375       |              |        |       |         |                |               |       |            |        | 0.007      |         |         | 0.001   | 0.001    |            |
| 55     | 3D7    | 378       | 0.019        | 0.022  | 0.041 | 0.013   |                |               | 0.039 | 0.039      |        | 0.007      |         | 0.018   | 0.020   | 0.015    |            |
| 56     | 3D7    | 384       |              | 0.016  |       |         |                |               | 0.006 | 0.013      |        | 0.007      | 0.010   | 0.018   | 0.006   | 0.005    |            |
| 57     | 3D7    | 390       |              |        |       |         |                |               |       |            |        |            | 0.010   |         | 0.001   | 0.001    |            |
| 58     | 3D7    | 393       |              | 0.022  |       | 0.013   |                | 0.030         | 0.010 | 0.013      |        |            |         |         | 0.009   | 0.007    |            |
| 59     | 3D7    | 396       |              | 0.005  |       |         |                |               | 0.003 |            |        |            |         |         | 0.002   | 0.002    |            |
| 60     | 3D7    | 408       |              |        |       |         |                |               |       |            |        |            |         | 0.018   | 0.001   | 0.001    |            |
| 61     | 3D7    | 411       |              | 0.011  |       |         | 0.032          |               | 0.006 | 0.013      |        |            |         |         | 0.004   | 0.005    |            |
| 62     | 3D7    | 423       | 0.010        | 0.011  | 0.041 |         |                |               | 0.003 |            |        |            |         |         | 0.005   | 0.005    |            |
| 63     | 3D7    | 485       |              |        |       |         |                |               | 0.003 |            |        |            |         |         | 0.001   |          |            |
| 64     | FC27   | 184       |              |        |       | 0.013   |                |               | 0.003 |            |        |            |         |         | 0.001   |          |            |
| 65     | FC27   | 222       | 0.005        |        |       |         |                |               | 0.006 |            |        |            |         |         | 0.003   | 0.002    |            |
| 66     | FC27   | 259       |              |        |       |         |                | 0.010         | 0.003 |            |        |            |         | 0.022   | 0.002   | 0.003    |            |
| 67     | FC27   | 268       |              | 0.005  |       |         |                |               | 0.003 |            |        |            |         |         | 0.002   | 0.001    |            |
| 68     | FC27   | 295       | 0.005        |        |       |         |                |               | 0.003 | 0.039      | 0.071  | 0.007      | 0.060   |         | 0.009   | 0.014    |            |
| 69     | FC27   | 316       | 0.005        |        |       | 0.013   |                |               | 0.006 |            |        |            |         |         | 0.003   | 0.002    |            |
| 70     | FC27   | 328       |              |        |       |         |                |               |       |            |        | 0.007      |         |         | 0.001   | 0.001    |            |
| 71     | FC27   | 331       | 0.149        | 0.142  | 0.082 | 0.127   | 0.226          | 0.192         | 0.104 | 0.105      |        | 0.092      | 0.120   | 0.125   | 0.123   | 0.118    |            |
| 72     | FC27   | 334       |              |        |       |         |                |               |       |            |        |            | 0.020   |         | 0.001   | 0.002    |            |
| 73     | FC27   | 352       |              |        |       |         |                |               |       |            |        | 0.007      |         |         | 0.001   | 0.001    |            |
| 74     | FC27   | 355       | 0.010        | 0.011  | 0.020 | 0.013   |                | 0.010         | 0.032 | 0.053      | 0.143  | 0.098      | 0.140   | 0.089   | 0.044   | 0.056    |            |
| 75     | FC27   | 364       |              |        |       |         |                |               |       |            |        | 0.007      |         |         | 0.001   | 0.001    |            |
| 76     | FC27   | 367       | 0.115        | 0.098  | 0.143 | 0.063   | 0.032          | 0.051         | 0.078 | 0.079      | 0.143  | 0.209      | 0.060   | 0.161   | 0.105   | 0.108    |            |
| 77     | FC27   | 370       |              | 0.005  |       |         |                |               |       | 0.013      |        |            |         |         | 0.001   | 0.001    |            |
| 78     | FC27   | 403       | 0.024        |        |       | 0.038   | 0.032          | 0.010         | 0.016 | 0.026      |        |            | 0.020   |         | 0.014   | 0.013    |            |
| 79     | FC27   | 406       |              |        |       | 0.013   |                |               |       |            |        |            |         |         | 0.001   | 0.001    |            |
| 80     | FC27   | 412       | 0.005        |        |       |         |                |               | 0.003 |            |        |            |         |         | 0.001   | 0.001    |            |
| 81     | FC27   | 415       |              |        |       |         |                |               |       |            |        | 0.007      |         |         | 0.001   | 0.001    |            |
| 82     | FC27   | 451       |              |        |       |         |                |               |       |            |        | 0.007      |         | 0.022   | 0.001   | 0.002    |            |
| 83     | FC27   | 512       |              |        |       |         |                |               | 0.003 |            |        |            |         |         | 0.001   |          |            |
